# Supplementary material for: Research on nursing practice of transcutaneous femoral vein as temporary vascular access for artificial liver
Source: Research Square preprint supplement (doi:10.21203/rs.3.rs-7575192/v1), 2025-11-25
Supplement: Supplementary file 1 [file 08229d45d3fa36f36e72ca69.docx]

# Questionnaire on Nursing Practice for Transcutaneous Femoral Vein Temporary Vascular Access in Artificial Liver Support Therapy

This questionnaire aims to assess current nursing practices related to transcutaneous femoral vein temporary vascular access for artificial liver support therapy. Please select the most appropriate answer for each question based on your actual clinical experience. All responses are anonymous and used solely for research purposes.

## Section A – General Information

1. Gender □ Male □ Female

2. Age (years) □ 20–30 □ 31–40 □ >40

3. Years of work experience □ 1–5 □ 6–15 □ >15

4. Education level □ Associate □ Bachelor □ Master

5. Professional title □ Nurse □ Nurse Practitioner □ Head Nurse □ Chief Nurse

6. Member of vascular access team □ Yes □ No

7. Teaching mentor □ Yes □ No

8. Number of related trainings within the past year □ 0 □ 1–2 □ ≥3

9. Main learning method □ Lecture □ Workshop □ Self-study □ Online course

10. Main reasons affecting vascular access practice □ Heavy workload □ Lack of knowledge/evidence □ Complex procedures □ Other (please specify __________)

## Section B – Nursing Practice Evaluation

Each item is rated on a 4-point Likert scale: 1 = Never 2 = Sometimes 3 = Often 4 = Always

| **Domain** | **Item** | **Statement** |
| --- | --- | --- |
| Vascular Access Establishment | A1 | The operator meets qualification and training requirements. |
|  | A2 | The puncture site and environment meet aseptic and safety standards. |
|  | A3 | The range of skin preparation is sufficient and standardized. |
|  | A4 | Hand hygiene and aseptic technique are strictly followed. |
| Management during Catheterization | A5 | Secondary catheter fixation is routinely performed. |
|  | A6 | Dressing is changed according to protocol or when contaminated. |
|  | A7 | Catheter is clearly labeled and recorded. |
|  | A8 | Bleeding or exudation is promptly managed. |
|  | A9 | Catheter fixation is stable and secure. |
|  | A10 | Leg circumference is measured regularly. |
|  | A11 | Patients are guided to perform limb functional exercises. |
|  | A12 | Catheter-related complications (infection, DVT, bleeding, hematoma) are correctly identified and managed. |
|  | A13 | Catheter-related health education is provided to patients. |
| Catheter Removal | A14 | Indications for catheter removal are properly assessed. |
|  | A15 | Discarded catheters are disposed of safely. |
|  | A16 | Post-removal hemostasis is performed appropriately. |

Total score: sum of all items (range: 16–64 points).
